# Supplementary material for: A closer look at severe acute kidney injury: risk factors and outcomes in PD-1/PD-L1 antibody treatment from a retrospective study
Source: PeerJ journal article supplement (doi:10.7717/peerj.19886), 2025-08-26
Supplement: codebook.xlsx [file codebook.xlsx]

## Sheet: Sheet1
Parameter	Code note
ID
AKI	1=AKI 0= No AKI
AKIstage	1= AKI stage1, 2=AKI stage 2, 3=AKI stage 3
Died	1=died
followUpTimeAKIday
followUpTimeday
AKIOccurTime
extrarenalIRAEs	1=event
Thyroiddysfunction	1=event
Skininjuries	1=event
Gastrointestinalsymptoms	1=event
fever	1=event
pneumonia	1=event
Druginducedliverinjury	1=event
Other_A	1=event
Sex	1= male, 2=female
Age
SBP
DBP
Smoking	1=event
Alcohol	1=event
HBP	1=event
DM	1=event
COPD	1=event
Cirrhosis	1=event
CVD	1=event
HepatobiliaryPancreas	1=event
Lung	1=event
Urinarysystem	1=event
gastrointestinal	1=event
genitalsystmen	1=event
Melanoma	1=event
HeadNeck	1=event
Breast	1=event
Other	1=event
eGFR
ALT
GGT
LDLC
AST
UA
TC
ALB
GLO
P
Glu
LDH
MonoJ
EosJ
WBCJ
LymphJ
Hb
hsCRP
SGUrine
WBCUrineCl
PPI	1= PPI use
ACEIARB	1= ACEIARB use
NSAIDs	1= NSAIDs use
H2blockers	1= H2blockers use
Iohexol	1= Iohexol use
Antibiotics	1= Antibiotics use
Diuretics	1= Diuretics use
Chemotherapy	1= Chemotherapy use
otherantitumordrugs	1= otherantitumordrugs use
platinumdrugs	1= platinumdrugs use
gemcitabine	1= gemcitabine use
pemetrexed	1= pemetrexed use
cytotoxicdrugs	1= cytotoxicdrugs use
targeteddrug	1= targeteddrug use
interleukin	1= interleukin use
Immunecheckpointinhibitorclass	1= PD1 2=PDL1 3=PD1&PDL1
PreAKIDoseofPD1
PreAKITimesofPD1
Totalnumberofdosesadministered
Thetotaldosewasadministered
